# Supplementary material for: Network analysis of exploratory behaviors of mice in a spatial learning and memory task
Source: PubMed Central journal article supplement (PMC5507260; doi:10.1371/journal.pone.0180789), 2017-07-10
Supplement: pone.0180789.s001.pdf [file pone.0180789.s001.pdf]

**Table A. Analysis of variance (ANOVA) for conventional features of the entries across training days.** The columns indicate feature, source of variation, sum of squares (SS), degree of freedom (df), mean square (MS), F value,  $p$  value, and alternative hypothesis ( $H_1$ ). An asterisk indicates that an alternative hypothesis was true.

| Feature         | Source                          | SS            | df  | MS            | F     | $p$  | $H_1$ |
|-----------------|---------------------------------|---------------|-----|---------------|-------|------|-------|
| No. of errors   | Main effect: Entry              | 11.06         | 1   | 11.06         | 0.28  | 0.60 |       |
|                 | Error: S(Entry)                 | 1,507.51      | 38  | 39.67         |       |      |       |
|                 | Main effect: Day                | 1,720.64      | 5   | 344.13        | 19.06 | 0.00 | *     |
|                 | Interaction: Entry $\times$ Day | 424.06        | 5   | 84.81         | 4.70  | 0.00 | *     |
|                 | Error: Day $\times$ S(Entry)    | 3,429.96      | 190 | 18.05         |       |      |       |
| Latency         | Main effect: Entry              | 1,286.11      | 1   | 1,286.11      | 0.24  | 0.63 |       |
|                 | Error: S(Entry)                 | 206,273.61    | 38  | 5,428.25      |       |      |       |
|                 | Main effect: Day                | 46,958.75     | 5   | 9,391.75      | 9.63  | 0.00 | *     |
|                 | Interaction: Entry $\times$ Day | 20,512.04     | 5   | 4,102.41      | 4.21  | 0.00 | *     |
|                 | Error: Day $\times$ S(Entry)    | 185,289.33    | 190 | 975.21        |       |      |       |
| Travel distance | Main effect: Entry              | 2,768,999.56  | 1   | 2,768,999.56  | 3.01  | 0.09 |       |
|                 | Error: S(Entry)                 | 35,002,939.14 | 38  | 921,129.98    |       |      |       |
|                 | Main effect: Day                | 54,652,073.01 | 5   | 10,930,414.60 | 22.55 | 0.00 | *     |
|                 | Interaction: Entry $\times$ Day | 15,684,835.96 | 5   | 3,136,967.19  | 6.47  | 0.00 | *     |
|                 | Error: Day $\times$ S(Entry)    | 92,109,257.05 | 190 | 484,785.56    |       |      |       |

**Table B. Multiple comparisons by Tukey's honest significant difference (HSD) test for the effect of entry mode on Day 1.** The columns indicate feature, day, degree of freedom,  $t$  value, alternative hypothesis, and Pearson's  $R$ . An asterisk indicates that an alternative hypothesis was true.

| <b>Feature</b>  | <b>Day</b> | <b>df</b> | <b><math>t</math></b> | <b><math>H_1</math></b> | <b><math>R</math></b> |
|-----------------|------------|-----------|-----------------------|-------------------------|-----------------------|
| No. of errors   | 1          | 38        | 2.97                  | *                       | 0.43                  |
| Latency         | 1          | 38        | 3.00                  | *                       | 0.44                  |
| Travel distance | 1          | 38        | 3.87                  | *                       | 0.53                  |

**Table C. Multiple comparisons between days within each conventional feature.** Each sub-table shows the pairwise comparisons by Tukey’s HSD test. An asterisk with an effect size (Pearson’s *R*) is used to indicate a significant difference in the values of a conventional feature between any 2 days.

| Entry           | Feature         |   | 1       | 2       | 3       | 4       | 5       | 6       |         |
|-----------------|-----------------|---|---------|---------|---------|---------|---------|---------|---------|
| MANUAL          | No. of errors   | 1 |         |         |         |         |         | *(0.63) |         |
|                 |                 | 2 |         |         |         | *(0.52) | *(0.73) | *(0.73) |         |
|                 |                 | 3 |         |         |         |         |         |         |         |
|                 |                 | 4 |         |         |         |         |         |         |         |
|                 |                 | 5 |         |         |         |         |         |         |         |
|                 |                 | 6 |         |         |         |         |         |         |         |
|                 | Latency         | 1 |         |         |         |         |         |         |         |
|                 |                 | 2 |         |         |         |         |         | *(0.79) | *(0.81) |
|                 |                 | 3 |         |         |         |         |         |         | *(0.35) |
|                 |                 | 4 |         |         |         |         |         |         |         |
|                 |                 | 5 |         |         |         |         |         |         |         |
|                 |                 | 6 |         |         |         |         |         |         |         |
|                 | Travel distance | 1 |         |         |         |         |         | *(0.59) | *(0.66) |
|                 |                 | 2 |         |         |         |         | *(0.45) | *(0.79) | *(0.81) |
|                 |                 | 3 |         |         |         |         |         |         |         |
|                 |                 | 4 |         |         |         |         |         |         |         |
|                 |                 | 5 |         |         |         |         |         |         |         |
|                 |                 | 6 |         |         |         |         |         |         |         |
| LIFT            | No. of errors   | 1 |         | *(0.64) | *(0.60) | *(0.82) | *(0.84) | *(0.82) |         |
|                 |                 | 2 |         |         |         |         | *(0.76) |         |         |
|                 |                 | 3 |         |         |         |         | *(0.69) |         |         |
|                 |                 | 4 |         |         |         |         |         |         |         |
|                 |                 | 5 |         |         |         |         |         |         |         |
|                 |                 | 6 |         |         |         |         |         |         |         |
|                 | Latency         | 1 |         | *(0.61) | *(0.67) | *(0.81) | *(0.82) | *(0.84) |         |
|                 |                 | 2 |         |         |         |         |         |         |         |
|                 |                 | 3 |         |         |         |         |         |         |         |
|                 |                 | 4 |         |         |         |         |         |         |         |
|                 |                 | 5 |         |         |         |         |         |         |         |
|                 |                 | 6 |         |         |         |         |         |         |         |
| Travel distance | 1               |   | *(0.69) | *(0.69) | *(0.82) | *(0.86) | *(0.83) |         |         |
|                 | 2               |   |         |         |         | *(0.81) |         |         |         |
|                 | 3               |   |         |         |         | *(0.72) |         |         |         |
|                 | 4               |   |         |         |         |         |         |         |         |
|                 | 5               |   |         |         |         |         |         |         |         |
|                 | 6               |   |         |         |         |         |         |         |         |

**Table D. ANOVA for the time spent around each hole between entries.** The columns indicate feature, source of variation, sum of squares, degree of freedom, mean square, F value, *p* value, and alternative hypothesis. An asterisk indicates that an alternative hypothesis was true.

| <b>Feature</b> | <b>Source</b>              | <b>SS</b>  | <b>df</b> | <b>MS</b> | <b>F</b> | <b><i>p</i></b> | <b>H<sub>1</sub></b> |
|----------------|----------------------------|------------|-----------|-----------|----------|-----------------|----------------------|
| No. of visits  | Main effect: Entry         | 478.80     | 1         | 478.80    | 1.51     | 0.23            |                      |
|                | Error: S(Entry)            | 12,079.17  | 38        | 317.87    |          |                 |                      |
|                | Main effect: Angle         | 414,119.32 | 11        | 37,647.21 | 39.48    | 0.00            | *                    |
|                | Interaction: Entry × Angle | 12,413.32  | 11        | 1,128.48  | 1.18     | 0.00            | *                    |
|                | Error: Angle × S(Entry)    | 398,609.81 | 418       | 953.61    |          |                 |                      |

**Table E. Multiple comparisons of time spent around each hole in the effect of entry as determined by Tukey's HSD test.** The columns indicate feature, angle, degree of freedom,  $t$  value, alternative hypothesis, and Pearson's  $R$ . An asterisk indicates that an alternative hypothesis was true.

| <b>Feature</b>                              | <b>Angle</b> | <b>df</b> | <b><math>t</math></b> | <b><math>H_1</math></b> | <b><math>R</math></b> |
|---------------------------------------------|--------------|-----------|-----------------------|-------------------------|-----------------------|
| Time spent around each hole<br>(probe test) | Target       | 38        | 1.10                  | *                       | 0.18                  |



**Table G. Kruskal–Wallis test for the usage of search strategies between the MANUAL and LIFT entry groups each day.** The columns indicate training day, search strategy, degree of freedom, chi-square value ( $\chi^2$ ),  $p$  value, alternative hypothesis, and test number. An asterisk indicates that an alternative hypothesis was true. No significant differences were observed at the 5% level.

| Day | Strategy | df | $\chi^2$ | $p$  | H <sub>1</sub> | Test |
|-----|----------|----|----------|------|----------------|------|
| 1   | Random   | 1  | 1.30     | 0.25 |                | 1    |
|     | Serial   | 1  | 0.41     | 0.52 |                | 2    |
|     | Spatial  | 1  | 0.56     | 0.45 |                | 3    |
| 2   | Random   | 1  | 0.11     | 0.74 |                | 4    |
|     | Serial   | 1  | 0.10     | 0.75 |                | 5    |
|     | Spatial  | 1  | 0.04     | 0.84 |                | 6    |
| 3   | Random   | 1  | 0.90     | 0.34 |                | 7    |
|     | Serial   | 1  | 0.24     | 0.62 |                | 8    |
|     | Spatial  | 1  | 0.11     | 0.74 |                | 9    |
| 4   | Random   | 1  | 1.14     | 0.29 |                | 10   |
|     | Serial   | 1  | 3.26     | 0.07 |                | 11   |
|     | Spatial  | 1  | 0.26     | 0.61 |                | 12   |
| 5   | Random   | 1  | 0.00     | 0.97 |                | 13   |
|     | Serial   | 1  | 0.46     | 0.50 |                | 14   |
|     | Spatial  | 1  | 1.24     | 0.27 |                | 15   |
| 6   | Random   | 1  | 0.34     | 0.56 |                | 16   |
|     | Serial   | 1  | 0.22     | 0.64 |                | 17   |
|     | Spatial  | 1  | 0.02     | 0.90 |                | 18   |

**Table H. Friedman test for strategy usage within a single day for every entry.** The columns indicate entry mode, training day, degree of freedom, chi-square value,  $p$  value, alternative hypothesis, and test number. An asterisk indicates that an alternative hypothesis was true.

| Entry  | Day | df | $\chi^2$ | $p$  | $H_1$ | Test |
|--------|-----|----|----------|------|-------|------|
| MANUAL | 1   | 2  | 22.44    | 0.00 | *     | 1    |
|        | 2   | 2  | 23.78    | 0.00 | *     | 2    |
|        | 3   | 2  | 8.20     | 0.02 | *     | 3    |
|        | 4   | 2  | 4.78     | 0.09 |       | 4    |
|        | 5   | 2  | 1.19     | 0.55 |       | 5    |
|        | 6   | 2  | 0.35     | 0.84 |       | 6    |
| LIFT   | 1   | 2  | 23.64    | 0.00 | *     | 7    |
|        | 2   | 2  | 13.69    | 0.00 | *     | 8    |
|        | 3   | 2  | 10.70    | 0.00 | *     | 9    |
|        | 4   | 2  | 12.11    | 0.00 | *     | 10   |
|        | 5   | 2  | 0.60     | 0.74 |       | 11   |
|        | 6   | 2  | 0.76     | 0.68 |       | 12   |



**Table I. Multiple comparisons of strategy usage.** The table shows pairwise comparisons as determined using the sign test adjusted with the Ryan procedure for each test in which a significant difference was indicated in S8 Table. An asterisk indicates that an alternative hypothesis was true.

| <b>Entry</b> | <b>Day</b> | <b>Random</b> | <b>Serial</b> | <b>Spatial</b> |
|--------------|------------|---------------|---------------|----------------|
| MANUAL       | 1          | Random        | *             | *              |
|              |            | Serial        |               |                |
|              |            | Spatial       |               |                |
|              | 2          | Random        | *             | *              |
|              |            | Serial        |               |                |
|              |            | Spatial       |               |                |
| 3            | Random     | *             |               |                |
|              | Serial     |               |               |                |
|              | Spatial    |               |               |                |
| LIFT         | 1          | Random        | *             | *              |
|              |            | Serial        |               |                |
|              |            | Spatial       |               |                |
|              | 2          | Random        | *             | *              |
|              |            | Serial        |               |                |
|              |            | Spatial       |               |                |
|              | 3          | Random        | *             | *              |
|              |            | Serial        |               |                |
|              |            | Spatial       |               |                |
|              | 4          | Random        | *             |                |
| Serial       |            |               |               |                |
|              |            | Spatial       |               |                |

**Table J. Friedman test for strategy usage changes by entry type across days.** The columns indicate entry mode, strategy, degree of freedom, chi-square value,  $p$  value, alternative hypothesis, and test number. An asterisk indicates that an alternative hypothesis was true.

| <b>Entry</b> | <b>Strategy</b> | <b>df</b> | <b><math>\chi^2</math></b> | <b><math>p</math></b> | <b>H<sub>1</sub></b> | <b>Test</b> |
|--------------|-----------------|-----------|----------------------------|-----------------------|----------------------|-------------|
| MANUAL       | Random          | 5         | 23.98                      | 0.00                  | *                    | 1           |
|              | Serial          | 5         | 19.94                      | 0.00                  | *                    | 2           |
|              | Spatial         | 5         | 8.22                       | 0.14                  |                      | 3           |
| LIFT         | Random          | 5         | 31.20                      | 0.00                  | *                    | 4           |
|              | Serial          | 5         | 18.90                      | 0.00                  | *                    | 5           |
|              | Spatial         | 5         | 18.41                      | 0.00                  | *                    | 6           |

**Table K. Multiple comparisons of temporal changes for each strategy.** The table shows pairwise comparisons as determined using the sign test adjusted with the Ryan procedure for each test in which a significant difference was indicated in S10 Table. An asterisk indicates that an alternative hypothesis was true.

| Entry   | Strategy | 1 | 2 | 3 | 4 | 5 | 6 |  |
|---------|----------|---|---|---|---|---|---|--|
| MANUAL  | Random   | 1 |   |   |   |   | * |  |
|         |          | 2 |   |   |   |   | * |  |
|         |          | 3 |   |   |   |   |   |  |
|         |          | 4 |   |   |   |   |   |  |
|         |          | 5 |   |   |   |   |   |  |
|         |          | 6 |   |   |   |   |   |  |
|         | Serial   | 1 |   |   |   |   | * |  |
|         |          | 2 |   |   |   |   |   |  |
|         |          | 3 |   |   |   |   |   |  |
|         |          | 4 |   |   |   |   |   |  |
|         |          | 5 |   |   |   |   |   |  |
|         |          | 6 |   |   |   |   |   |  |
| LIFT    | Random   | 1 |   |   |   | * | * |  |
|         |          | 2 |   |   |   | * |   |  |
|         |          | 3 |   |   |   |   |   |  |
|         |          | 4 |   |   |   |   | * |  |
|         |          | 5 |   |   |   |   |   |  |
|         |          | 6 |   |   |   |   |   |  |
|         | Serial   | 1 |   |   |   |   |   |  |
|         |          | 2 |   |   |   |   |   |  |
|         |          | 3 |   |   |   |   |   |  |
|         |          | 4 |   |   |   |   |   |  |
|         |          | 5 |   |   |   |   |   |  |
|         |          | 6 |   |   |   |   |   |  |
| Spatial | 1        |   |   |   |   |   |   |  |
|         | 2        |   |   |   |   |   |   |  |
|         | 3        |   |   |   |   |   |   |  |
|         | 4        |   |   |   |   |   |   |  |

5

6

---

**Table L. Kruskal–Wallis test for network features of the dynamic node generation method between the MANUAL and LIFT entries per day.** The columns indicate node generation method, feature, day, degree of freedom, chi-square value,  $p$  value, alternative hypothesis, and test number. An asterisk indicates that an alternative hypothesis was true.

| Node generation method | Feature             | Day | df | $\chi^2$ | $p$  | $H_1$ | Test |
|------------------------|---------------------|-----|----|----------|------|-------|------|
| Dynamic                | $\bar{o}$           | 1   | 1  | 7.84     | 0.01 | *     | 1    |
|                        |                     | 2   | 1  | 0.04     | 0.84 |       | 2    |
|                        |                     | 3   | 1  | 0.36     | 0.55 |       | 3    |
|                        |                     | 4   | 1  | 2.67     | 0.10 |       | 4    |
|                        |                     | 5   | 1  | 0.08     | 0.77 |       | 5    |
|                        |                     | 6   | 1  | 2.26     | 0.13 |       | 6    |
|                        | $\bar{n}$           | 1   | 1  | 8.64     | 0.00 | *     | 7    |
|                        |                     | 2   | 1  | 0.07     | 0.80 |       | 8    |
|                        |                     | 3   | 1  | 1.02     | 0.31 |       | 9    |
|                        |                     | 4   | 1  | 2.95     | 0.09 |       | 10   |
|                        |                     | 5   | 1  | 0.60     | 0.44 |       | 11   |
|                        |                     | 6   | 1  | 2.27     | 0.13 |       | 12   |
|                        | $\bar{m}$           | 1   | 1  | 9.84     | 0.00 | *     | 13   |
|                        |                     | 2   | 1  | 0.23     | 0.63 |       | 14   |
|                        |                     | 3   | 1  | 0.76     | 0.38 |       | 15   |
|                        |                     | 4   | 1  | 3.79     | 0.05 |       | 16   |
|                        |                     | 5   | 1  | 0.60     | 0.44 |       | 17   |
|                        |                     | 6   | 1  | 2.27     | 0.13 |       | 18   |
|                        | $\bar{p}$           | 1   | 1  | 4.35     | 0.04 | *     | 19   |
|                        |                     | 2   | 1  | 0.05     | 0.83 |       | 20   |
|                        |                     | 3   | 1  | 0.63     | 0.43 |       | 21   |
|                        |                     | 4   | 1  | 1.23     | 0.27 |       | 22   |
|                        |                     | 5   | 1  | 6.14     | 0.01 | *     | 23   |
|                        |                     | 6   | 1  | 0.46     | 0.50 |       | 24   |
|                        | $\overline{C_{ws}}$ | 1   | 1  | 2.27     | 0.13 |       | 25   |
|                        |                     | 2   | 1  | 2.27     | 0.13 |       | 26   |
|                        |                     | 3   | 1  | 0.90     | 0.34 |       | 27   |
|                        |                     | 4   | 1  | N/A      | N/A  | N/A   | 28   |
|                        |                     | 5   | 1  | N/A      | N/A  | N/A   | 29   |
|                        |                     | 6   | 1  | N/A      | N/A  | N/A   | 30   |

|            |   |   |      |      |   |    |
|------------|---|---|------|------|---|----|
| $\bar{t}$  | 1 | 1 | 8.86 | 0.00 | * | 31 |
|            | 2 | 1 | 0.23 | 0.63 |   | 32 |
|            | 3 | 1 | 1.13 | 0.29 |   | 33 |
|            | 4 | 1 | 2.71 | 0.10 |   | 34 |
|            | 5 | 1 | 0.60 | 0.44 |   | 35 |
|            | 6 | 1 | 2.35 | 0.12 |   | 36 |
| $\bar{x}$  | 1 | 1 | 0.28 | 0.60 |   | 37 |
|            | 2 | 1 | 6.13 | 0.01 | * | 38 |
|            | 3 | 1 | 1.29 | 0.26 |   | 39 |
|            | 4 | 1 | 0.12 | 0.73 |   | 40 |
|            | 5 | 1 | 0.09 | 0.77 |   | 41 |
|            | 6 | 1 | 2.48 | 0.12 |   | 42 |
| $\bar{cl}$ | 1 | 1 | 2.99 | 0.08 |   | 43 |
|            | 2 | 1 | 0.54 | 0.46 |   | 44 |
|            | 3 | 1 | 0.02 | 0.89 |   | 45 |
|            | 4 | 1 | 1.13 | 0.29 |   | 46 |
|            | 5 | 1 | 3.75 | 0.05 |   | 47 |
|            | 6 | 1 | 0.05 | 0.82 |   | 48 |

**Table M. Friedman test for changes in network features of the dynamic node generation method across days within entry.** The columns indicate entry mode, node generation method, network feature, degree of freedom, chi-square value,  $p$  value, alternative hypothesis, and test number. An asterisk indicates that an alternative hypothesis was true.

| Entry  | Node generation method | Feature             | df | $\chi^2$ | $p$  | $H_1$ | Test |
|--------|------------------------|---------------------|----|----------|------|-------|------|
| MANUAL | Dynamic                | $\bar{o}$           | 5  | 27.98    | 0.00 | *     | 1    |
|        |                        | $\bar{n}$           | 5  | 26.87    | 0.00 | *     | 2    |
|        |                        | $\bar{m}$           | 5  | 27.37    | 0.00 | *     | 3    |
|        |                        | $\bar{\rho}$        | 5  | 4.16     | 0.53 |       | 4    |
|        |                        | $\overline{C_{ws}}$ | 5  | 5.00     | 0.42 |       | 5    |
|        |                        | $\bar{l}$           | 5  | 26.42    | 0.00 | *     | 6    |
|        |                        | $\bar{x}$           | 5  | 27.30    | 0.00 | *     | 7    |
|        |                        | $\bar{cl}$          | 5  | 0.58     | 0.99 |       | 8    |
| LIFT   | Dynamic                | $\bar{o}$           | 5  | 46.32    | 0.00 | *     | 16   |
|        |                        | $\bar{n}$           | 5  | 46.79    | 0.00 | *     | 17   |
|        |                        | $\bar{m}$           | 5  | 45.02    | 0.00 | *     | 18   |
|        |                        | $\bar{\rho}$        | 5  | 34.39    | 0.00 | *     | 19   |
|        |                        | $\overline{C_{ws}}$ | 5  | 8.82     | 0.12 |       | 20   |
|        |                        | $\bar{l}$           | 5  | 46.44    | 0.00 | *     | 21   |
|        |                        | $\bar{x}$           | 5  | 31.86    | 0.00 | *     | 22   |
|        |                        | $\bar{cl}$          | 5  | 11.35    | 0.04 | *     | 23   |

**Table N. Multiple comparisons between days within each network feature of the dynamic node generation method.** The table shows pairwise comparisons as determined using the sign test adjusted with the Ryan procedure for each test in which a significant difference was indicated in S13 Table. If there was a significant difference in the value of a network feature between any 2 days, an asterisk marks the corresponding cell.

| Entry  | Node generation method | Feature   | 1 | 2 | 3 | 4 | 5 | 6 |
|--------|------------------------|-----------|---|---|---|---|---|---|
|        |                        | $\bar{o}$ | 1 |   |   |   |   | * |
|        |                        |           | 2 |   |   |   |   |   |
|        |                        |           | 3 |   |   |   |   |   |
|        |                        |           | 4 |   |   |   |   |   |
|        |                        |           | 5 |   |   |   |   |   |
|        |                        |           | 6 |   |   |   |   |   |
|        |                        | $\bar{n}$ | 1 |   |   |   |   | * |
|        |                        |           | 2 |   |   |   |   |   |
|        |                        |           | 3 |   |   |   |   |   |
|        |                        |           | 4 |   |   |   |   |   |
|        |                        |           | 5 |   |   |   |   |   |
|        |                        |           | 6 |   |   |   |   |   |
| MANUAL | Dynamic                | $\bar{m}$ | 1 |   |   |   |   | * |
|        |                        |           | 2 |   |   |   |   |   |
|        |                        |           | 3 |   |   |   |   |   |
|        |                        |           | 4 |   |   |   |   |   |
|        |                        |           | 5 |   |   |   |   |   |
|        |                        |           | 6 |   |   |   |   |   |
|        |                        | $\bar{l}$ | 1 |   |   |   |   | * |
|        |                        |           | 2 |   |   |   |   |   |
|        |                        |           | 3 |   |   |   |   |   |
|        |                        |           | 4 |   |   |   |   |   |
|        |                        |           | 5 |   |   |   |   |   |
|        |                        |           | 6 |   |   |   |   |   |
|        |                        | $\bar{x}$ | 1 |   |   |   | * | * |
|        |                        |           | 2 |   |   |   |   |   |
|        |                        |           | 3 |   |   |   |   |   |
|        |                        |           | 4 |   |   |   |   |   |



|      |              |   |   |   |   |
|------|--------------|---|---|---|---|
|      |              | 5 |   |   |   |
|      |              | 6 |   |   |   |
|      |              | 1 | * | * | * |
|      |              | 2 |   | * | * |
|      | $\bar{o}$    | 3 |   |   |   |
|      |              | 4 |   |   |   |
|      |              | 5 |   |   |   |
|      |              | 6 |   |   |   |
|      |              | 1 | * | * | * |
|      |              | 2 |   | * | * |
|      | $\bar{n}$    | 3 |   |   |   |
|      |              | 4 |   |   |   |
|      |              | 5 |   |   |   |
|      |              | 6 |   |   |   |
|      |              | 1 | * | * | * |
|      |              | 2 |   | * | * |
|      | $\bar{m}$    | 3 |   |   |   |
|      |              | 4 |   |   |   |
|      |              | 5 |   |   |   |
|      |              | 6 |   |   |   |
| LIFT | Dynamic      | 1 | * | * |   |
|      |              | 2 |   | * |   |
|      | $\bar{\rho}$ | 3 |   |   |   |
|      |              | 4 |   |   |   |
|      |              | 5 |   |   |   |
|      |              | 6 |   |   |   |
|      |              | 1 | * | * | * |
|      |              | 2 |   | * | * |
|      | $\bar{l}$    | 3 |   |   |   |
|      |              | 4 |   |   |   |
|      |              | 5 |   |   |   |
|      |              | 6 |   |   |   |
|      |              | 1 |   | * |   |
|      |              | 2 |   | * | * |
|      | $\bar{x}$    | 3 |   |   |   |
|      |              | 4 |   |   |   |
|      |              | 5 |   |   |   |
|      |              | 6 |   |   |   |

---

|            |   |
|------------|---|
|            | 1 |
|            | 2 |
| $\bar{c}l$ | 3 |
|            | 4 |
|            | 5 |
|            | 6 |

---

**Table O. Kruskal–Wallis test for the network features of the static node generation method between the MANUAL and LIFT entry groups per day.** The columns indicate the node generation method, feature, day, degree of freedom, chi-square value,  $p$  value, alternative hypothesis, and test number. An asterisk indicates that an alternative hypothesis was true.

| Node generation method | Feature             | Day | df   | $\chi^2$ | $p$  | $H_1$ | Test |
|------------------------|---------------------|-----|------|----------|------|-------|------|
| Static                 | $\bar{n}$           | 1   | 1    | 12.26    | 0.00 | *     | 49   |
|                        |                     | 2   | 1    | 1.57     | 0.21 |       | 50   |
|                        |                     | 3   | 1    | 1.82     | 0.18 |       | 51   |
|                        |                     | 4   | 1    | 3.37     | 0.07 |       | 52   |
|                        |                     | 5   | 1    | 1.61     | 0.20 |       | 53   |
|                        |                     | 6   | 1    | 5.51     | 0.02 | *     | 54   |
|                        | $\bar{m}$           | 1   | 1    | 15.31    | 0.00 | *     | 55   |
|                        |                     | 2   | 1    | 0.33     | 0.57 |       | 56   |
|                        |                     | 3   | 1    | 1.92     | 0.17 |       | 57   |
|                        |                     | 4   | 1    | 1.40     | 0.24 |       | 58   |
|                        |                     | 5   | 1    | 0.09     | 0.76 |       | 59   |
|                        |                     | 6   | 1    | 3.58     | 0.06 |       | 60   |
|                        | $\bar{p}$           | 1   | 1    | 9.06     | 0.00 | *     | 61   |
|                        |                     | 2   | 1    | 0.88     | 0.35 |       | 62   |
|                        |                     | 3   | 1    | 1.85     | 0.17 |       | 63   |
|                        |                     | 4   | 1    | 2.89     | 0.09 |       | 64   |
|                        |                     | 5   | 1    | 0.56     | 0.45 |       | 65   |
|                        |                     | 6   | 1    | 2.87     | 0.09 |       | 66   |
|                        | $\overline{C_{ws}}$ | 1   | 1    | 0.47     | 0.50 |       | 67   |
|                        |                     | 2   | 1    | 1.86     | 0.17 |       | 68   |
|                        |                     | 3   | 1    | N/A      | N/A  | N/A   | 69   |
|                        |                     | 4   | 1    | N/A      | N/A  | N/A   | 70   |
|                        |                     | 5   | 1    | N/A      | N/A  | N/A   | 71   |
|                        |                     | 6   | 1    | N/A      | N/A  | N/A   | 72   |
| $\bar{l}$              | 1                   | 1   | 1.59 | 0.21     |      | 73    |      |
|                        | 2                   | 1   | 0.17 | 0.68     |      | 74    |      |
|                        | 3                   | 1   | 0.85 | 0.36     |      | 75    |      |
|                        | 4                   | 1   | 4.59 | 0.03     | *    | 76    |      |
|                        | 5                   | 1   | 2.79 | 0.09     |      | 77    |      |
|                        | 6                   | 1   | 4.97 | 0.03     | *    | 78    |      |

|            |   |   |       |      |   |    |
|------------|---|---|-------|------|---|----|
| $\bar{x}$  | 1 | 1 | 10.14 | 0.00 | * | 79 |
|            | 2 | 1 | 0.17  | 0.68 |   | 80 |
|            | 3 | 1 | 0.52  | 0.47 |   | 81 |
|            | 4 | 1 | 5.65  | 0.02 | * | 82 |
|            | 5 | 1 | 2.27  | 0.13 |   | 83 |
|            | 6 | 1 | 2.32  | 0.13 |   | 84 |
| <hr/>      |   |   |       |      |   |    |
| $\bar{cl}$ | 1 | 1 | 7.94  | 0.00 | * | 85 |
|            | 2 | 1 | 1.12  | 0.29 |   | 86 |
|            | 3 | 1 | 1.49  | 0.22 |   | 87 |
|            | 4 | 1 | 3.45  | 0.06 |   | 88 |
|            | 5 | 1 | 0.44  | 0.51 |   | 89 |
|            | 6 | 1 | 2.40  | 0.12 |   | 90 |

---

**Table P. Friedman test for network features changes in the static node generation method across days by entry type.** The columns indicate entry mode, node generation method, network feature, degree of freedom, chi-square value,  $p$  value, alternative hypothesis, and test number. An asterisk indicates that an alternative hypothesis was true.

| Entry               | Node generation method | Feature             | df     | $\chi^2$  | $p$  | H <sub>1</sub> | Test |
|---------------------|------------------------|---------------------|--------|-----------|------|----------------|------|
| MANUAL              | Static                 | $\bar{n}$           | 5      | 24.48     | 0.00 | *              | 9    |
|                     |                        | $\bar{m}$           | 5      | 11.95     | 0.04 | *              | 10   |
|                     |                        | $\bar{\rho}$        | 5      | 18.34     | 0.00 | *              | 11   |
|                     |                        | $\overline{C_{ws}}$ | 5      | 7.00      | 0.22 |                | 12   |
|                     |                        | $\bar{l}$           | 5      | 22.67     | 0.00 | *              | 13   |
|                     |                        | $\bar{x}$           | 5      | 7.16      | 0.21 |                | 14   |
|                     |                        | $\bar{cl}$          | 5      | 21.38     | 0.00 | *              | 15   |
|                     |                        | LIFT                | Static | $\bar{n}$ | 5    | 34.87          | 0.00 |
| $\bar{m}$           | 5                      |                     |        | 35.98     | 0.00 | *              | 25   |
| $\bar{\rho}$        | 5                      |                     |        | 29.34     | 0.00 | *              | 26   |
| $\overline{C_{ws}}$ | 5                      |                     |        | 10.00     | 0.08 |                | 27   |
| $\bar{l}$           | 5                      |                     |        | 9.26      | 0.10 |                | 28   |
| $\bar{x}$           | 5                      |                     |        | 31.15     | 0.00 | *              | 29   |
| $\bar{cl}$          | 5                      |                     |        | 29.00     | 0.00 | *              | 30   |

**Table Q. Multiple comparisons between days within each network feature of the static node generation method.** The table shows pairwise comparisons as determined using the sign test adjusted with the Ryan procedure for each test in which a significant difference was indicated in S16 Table. If there was a significant difference in the value of a network feature between any 2 days, an asterisk marks the corresponding cell.

| Entry  | Node generation method | Feature      | 1 | 2 | 3 | 4 | 5 | 6 |   |
|--------|------------------------|--------------|---|---|---|---|---|---|---|
| MANUAL | Static                 | $\bar{n}$    | 1 |   |   |   |   |   |   |
|        |                        |              | 2 |   |   |   | * | * |   |
|        |                        |              | 3 |   |   |   |   |   |   |
|        |                        |              | 4 |   |   |   |   |   |   |
|        |                        |              | 5 |   |   |   |   |   |   |
|        |                        |              | 6 |   |   |   |   |   |   |
|        | Static                 | $\bar{m}$    | 1 |   |   |   |   |   |   |
|        |                        |              | 2 |   |   |   |   |   | * |
|        |                        |              | 3 |   |   |   |   |   |   |
|        |                        |              | 4 |   |   |   |   |   |   |
|        |                        |              | 5 |   |   |   |   |   |   |
|        |                        |              | 6 |   |   |   |   |   |   |
|        | Static                 | $\bar{\rho}$ | 1 |   |   |   |   |   |   |
|        |                        |              | 2 |   |   |   |   |   | * |
|        |                        |              | 3 |   |   |   |   |   |   |
|        |                        |              | 4 |   |   |   |   |   |   |
|        |                        |              | 5 |   |   |   |   |   |   |
|        |                        |              | 6 |   |   |   |   |   |   |
|        | Static                 | $\bar{l}$    | 1 |   |   |   |   |   |   |
|        |                        |              | 2 |   |   |   |   |   |   |
|        |                        |              | 3 |   |   |   |   |   |   |
|        |                        |              | 4 |   |   |   |   |   |   |
|        |                        |              | 5 |   |   |   |   |   |   |
|        |                        |              | 6 |   |   |   |   |   |   |
| Static | $\bar{cl}$             | 1            |   |   |   |   |   |   |   |
|        |                        | 2            |   |   |   |   |   |   |   |
|        |                        | 3            |   |   |   |   |   |   |   |
|        |                        | 4            |   |   |   |   |   |   |   |
|        |                        | 5            |   |   |   |   |   |   |   |



**Table. R ANOVA for the time spent around each hole between the VEH and SCOP groups in the probe test.** The columns indicate feature, source of variation, sum of squares, degree of freedom, mean square, F value, *p* value, and alternative hypothesis. An asterisk indicates that an alternative hypothesis was true.

| Feature       | Source                         | SS          | df  | MS         | F     | <i>p</i> | H <sub>1</sub> |
|---------------|--------------------------------|-------------|-----|------------|-------|----------|----------------|
| No. of visits | Main effect: Treatment         | 5,148.69    | 1   | 5,148.69   | 5.54  | 0.02     | *              |
|               | Error: S(Treatment)            | 32,540.22   | 35  | 929.72     |       |          |                |
|               | Main effect: Angle             | 1983,479.60 | 11  | 180,316.33 | 52.49 | 0.00     | *              |
|               | Interaction: Treatment × Angle | 96284.32    | 11  | 8,753.12   | 2.55  | 0.00     | *              |
|               | Error: Angle × S(Treatment)    | 1322,656.67 | 385 | 3,435.47   |       |          |                |



**Table S. Multiple comparisons of time spent around each hole in the effect of treatment as determined by Tukey's HSD test.** The columns indicate feature, angle, degree of freedom,  $t$  value, alternative hypothesis, and Pearson's  $R$ . An asterisk indicates that an alternative hypothesis was true.

| <b>Feature</b>                              | <b>Angle (°)</b> | <b>df</b> | <b><math>t</math></b> | <b>H<sub>1</sub></b> | <b><math>R</math></b> |
|---------------------------------------------|------------------|-----------|-----------------------|----------------------|-----------------------|
| Time spent around each hole<br>(probe test) | -180             | 35        | 3.50                  | *                    | 0.51                  |
|                                             | -150             | 35        | 3.77                  | *                    | 0.54                  |
|                                             | Target           | 35        | 1.33                  | *                    | 0.22                  |
|                                             | 30               | 35        | 1.83                  | *                    | 0.30                  |



**Table U. Kruskal–Wallis test for the network features of both the dynamic and static node generation methods between the VEH and SCOP entry groups in the probe test.** The columns indicate the node generation method, feature, degree of freedom, chi-square value,  $p$  value, alternative hypothesis, and test number. An asterisk indicates that an alternative hypothesis was true.

| Node generation method | Feature             | df | $\chi^2$ | $p$  | $H_1$ | Test |
|------------------------|---------------------|----|----------|------|-------|------|
| Dynamic                | $\bar{o}$           | 1  | 0.00     | 0.95 |       | 1    |
|                        | $\bar{n}$           | 1  | 15.95    | 0.00 | *     | 2    |
|                        | $\bar{m}$           | 1  | 15.95    | 0.00 | *     | 3    |
|                        | $\bar{\rho}$        | 1  | 15.95    | 0.00 | *     | 4    |
|                        | $\overline{C_{ws}}$ | 1  | N/A      | N/A  |       | 5    |
|                        | $\bar{l}$           | 1  | 15.95    | 0.00 | *     | 6    |
|                        | $\bar{x}$           | 1  | 15.95    | 0.00 | *     | 7    |
|                        | $\bar{cl}$          | 1  | 15.95    | 0.00 | *     | 8    |
| Static                 | $\bar{n}$           | 1  | 6.37     | 0.01 | *     | 9    |
|                        | $\bar{m}$           | 1  | 6.06     | 0.01 | *     | 10   |
|                        | $\bar{\rho}$        | 1  | 0.12     | 0.73 |       | 11   |
|                        | $\overline{C_{ws}}$ | 1  | 0.04     | 0.84 |       | 12   |
|                        | $\bar{l}$           | 1  | 5.62     | 0.02 | *     | 13   |
|                        | $\bar{x}$           | 1  | 0.07     | 0.78 |       | 14   |
|                        | $\bar{cl}$          | 1  | 7.48     | 0.01 | *     | 15   |
